# Supplementary material for: Susceptibility and characteristics of infections in patients with glucocorticoid excess or insufficiency: the ICARO tool
Source: PubMed Central journal article supplement (PMC9641788; doi:10.1530/eje-22-0454), 2022-09-14
Supplement: supplementary_table_1.pdf [file supplementary_table_1.pdf]

**Supplementary Table 1.** Duration of infectious diseases in previous 12 months in controls and in patients with Cushing's Syndrome (CS) and mild autonomous cortisol secretion (MACS). Categorical variables are expressed as percentages and frequencies.  $p^*$  values for comparisons with controls.  $p^{\S}$  values for comparisons between CS and MACS. After correction for multiple testing,  $p < 0.05$  was considered as statistically significant (bold). <sup>a,b,c,d,e,f,g,h,i</sup>: significantly different duration compared with controls at post hoc analysis using multiple z-tests with Bonferroni correction.

|                                                              | Controls<br>(n=570)        | CS<br>(N=43)             | $p^*$ | MACS<br>(n=32) | $p^*$ | $p^{\S}$ |
|--------------------------------------------------------------|----------------------------|--------------------------|-------|----------------|-------|----------|
| <b>Upper Respiratory tract infections (URTIs) - duration</b> |                            |                          |       |                |       |          |
| less than 1 week                                             | 65% (279/429)              | 66% (23/35)              |       | 54% (15/28)    |       |          |
| from 1 to 2 weeks                                            | 28% (122/429)              | 26% (9/35)               | 0.903 | 39% (11/28)    | 0.742 | 0.516    |
| from 2 to 3 weeks                                            | 4% (19/429)                | 9% (3/35)                |       | 7% (2/28)      |       |          |
| more than 3 weeks                                            | 2% (9/429)                 | 0% (0)                   |       | 0% (0)         |       |          |
| <b>Lower respiratory tract infections (LRTIs) - duration</b> |                            |                          |       |                |       |          |
| less than 1 week                                             | 30% (19/64)                | 10% (1/10)               |       | 12.5% (1/8)    |       |          |
| from 1 to 2 weeks                                            | 55% (35/64)                | 60% (6/10)               | 0.060 | 87.5% (7/8)    | 0.742 | 0.409    |
| from 2 to 3 weeks                                            | 6% (3/64)                  | 20% (2/10)               |       | 0% (0)         |       |          |
| more than 3 weeks                                            | 9% (6/64)                  | 10% (1/10)               |       | 0% (0)         |       |          |
| <b>Gastrointestinal tract infections (GITs) - duration</b>   |                            |                          |       |                |       |          |
| less than 1 week                                             | 88% (163/185) <sup>a</sup> | 57% (12/21) <sup>a</sup> |       | 65% (11/17)    |       |          |
| from 1 to 2 weeks                                            | 11% (20/185) <sup>b</sup>  | 29% (6/21) <sup>b</sup>  | 0.037 | 29% (5/17)     | 0.114 | 0.946    |
| from 2 to 3 weeks                                            | 0.5% (1/185)               | 0% (0)                   |       | 0% (0)         |       |          |
| more than 3 weeks                                            | 0.5% (1/185) <sup>c</sup>  | 14% (3/21) <sup>c</sup>  |       | 6% (1/17)      |       |          |
| <b>Skin infections 1 (SSTIs-1) - duration</b>                |                            |                          |       |                |       |          |
| less than 1 week                                             | 56% (79/142)               | 50% (5/10)               |       | 75% (6/8)      |       |          |
| from 1 to 2 weeks                                            | 30% (42/142)               | 20% (2/10)               | 0.790 | 25% (2/8)      | 0.901 | 0.407    |
| from 2 to 3 weeks                                            | 6% (9/142)                 | 20% (2/10)               |       | 0% (0)         |       |          |
| more than 3 weeks                                            | 8% (12/142)                | 10% (1/10)               |       | 0% (0)         |       |          |
| <b>Skin infections 2 (SSTIs-2) - duration</b>                |                            |                          |       |                |       |          |
| less than 1 week                                             | 56% (49/88) <sup>d</sup>   | 20% (2/10) <sup>d</sup>  |       | 50% (2/4)      |       |          |
| from 1 to 2 weeks                                            | 33% (29/88)                | 30% (3/10)               | 0.034 | 25% (1/4)      | 0.290 | 0.540    |
| from 2 to 3 weeks                                            | 2% (2/88) <sup>e</sup>     | 20% (2/10) <sup>e</sup>  |       | 25% (1/4)      |       |          |
| more than 3 weeks                                            | 9% (8/88) <sup>f</sup>     | 30% (3/10) <sup>f</sup>  |       | 0% (0)         |       |          |
| <b>Mycosis (MYC) - duration</b>                              |                            |                          |       |                |       |          |
| less than 1 week                                             | 33% (21/63) <sup>g</sup>   | 33% (6/18) <sup>g</sup>  |       | 60% (3/5)      |       |          |
| from 1 to 2 weeks                                            | 48% (30/63) <sup>h</sup>   | 6% (1/18) <sup>h</sup>   | 0.016 | 40% (2/5)      | 0.894 | 0.062    |
| from 2 to 3 weeks                                            | 5% (3/63) <sup>i</sup>     | 33% (6/18) <sup>i</sup>  |       | 0% (0)         |       |          |
| more than 3 weeks                                            | 14% (9/63)                 | 28% (5/18)               |       | 0% (0)         |       |          |
| <b>Sexually transmitted infections (STIs) - duration</b>     |                            |                          |       |                |       |          |
| less than 1 week                                             | 22% (2/9)                  | 100% (1/1)               |       | 100% (1/1)     |       |          |
| from 1 to 2 weeks                                            | 67% (6/9)                  | 0% (0)                   | 0.651 | 0% (0)         | 0.644 | 0.143    |
| from 2 to 3 weeks                                            | 0% (0)                     | 0% (0)                   |       | 0% (0)         |       |          |
| more than 3 weeks                                            | 11% (1/9)                  | 0% (0)                   |       | 0% (0)         |       |          |
| <b>Urinary tract infections (UTIs) - duration</b>            |                            |                          |       |                |       |          |
| less than 1 week                                             | 70% (59/86)                | 56.5% (13/23)            |       | 64% (9/14)     |       |          |
| from 1 to 2 weeks                                            | 24% (21/86)                | 26% (6/23)               | 0.802 | 14% (2/14)     | 0.758 | 0.843    |
| from 2 to 3 weeks                                            | 2% (2/86)                  | 4% (1/23)                |       | 7% (1/14)      |       |          |
| More than 3 weeks                                            | 5% (4/86)                  | 13% (3/23)               |       | 14% (2/14)     |       |          |
