# Supplementary material for: Susceptibility and characteristics of infections in patients with glucocorticoid excess or insufficiency: the ICARO tool
Source: PubMed Central journal article supplement (PMC9641788; doi:10.1530/eje-22-0454), 2022-09-14
Supplement: supplementary_table_2.pdf [file supplementary_table_2.pdf]

**Supplementary Table 2.** Duration of infectious diseases occurring in previous 12 months in patients with hypocortisolism and in the subgroups of patients with primary adrenal insufficiency (PAI) and secondary adrenal insufficiency (SAI). Categorical variables are expressed as percentages and frequencies.  $p^*$  values for comparisons with controls.  $p^{\S}$  values for comparisons between PAI and SAI. After correction for multiple testing a  $p < 0.05$  was considered as significant statistically different (bold). <sup>a,b,c</sup> significantly different duration compared with controls at post hoc analysis using multiple z-tests with Bonferroni correction.

|                                                              | Controls<br>(n=570)        | Hypocortisolism<br>(n=135) | $p^*$        | PAI<br>(n=32)           | $p^*$        | SAI<br>(n=103) | $p^*$ | $p^{\S}$ |
|--------------------------------------------------------------|----------------------------|----------------------------|--------------|-------------------------|--------------|----------------|-------|----------|
| <b>Upper respiratory tract infections (URTIs) - duration</b> |                            |                            |              |                         |              |                |       |          |
| less than 1 week                                             | 65% (279/429) <sup>a</sup> | 53% (55/103)               |              | 35% (8/23) <sup>a</sup> |              | 59% (47/80)    |       |          |
| from 1 to 2 weeks                                            | 28% (122)                  | 39% (40)                   |              | 45.5% (10)              |              | 37.5% (30)     |       |          |
| from 2 to 3 weeks                                            | 4% (19)                    | 5% (5)                     | 0.459        | 13% (3)                 | <b>0.036</b> | 2.5% (2)       | 0.748 | 0.058    |
| more than 3 weeks                                            | 2% (9) <sup>b</sup>        | 3% (3)                     |              | 8.5% (2) <sup>b</sup>   |              | 1% (1)         |       |          |
| <b>Lower respiratory tract infections (LRTIs) - duration</b> |                            |                            |              |                         |              |                |       |          |
| less than 1 week                                             | 30% (19/64)                | 7% (1)                     |              | 33% (2/6)               |              | 9% (1/11)      |       |          |
| from 1 to 2 weeks                                            | 55% (35)                   | 33% (5)                    |              | 17% (1)                 |              | 36% (4)        |       |          |
| from 2 to 3 weeks                                            | 6% (3) <sup>c</sup>        | 35% (6) <sup>c</sup>       | <b>0.033</b> | 33% (2)                 | 0.291        | 36% (4)        | 0.143 | 0.611    |
| more than 3 weeks                                            | 9% (6)                     | 18% (3)                    |              | 17% (1)                 |              | 18% (2)        |       |          |
| <b>Gastrointestinal tract infections (GITs)- duration</b>    |                            |                            |              |                         |              |                |       |          |
| less than 1 week                                             | 88% (163/185)              | 75% (51/68)                |              | 65% (11/17)             |              | 65% (11/17)    |       |          |
| from 1 to 2 weeks                                            | 11% (20)                   | 23.5% (13)                 |              | 29% (5)                 |              | 29% (5)        |       |          |
| from 2 to 3 weeks                                            | 0.5% (1)                   | 0% (0)                     | 0.200        | 0% (0)                  | 0.083        | 0% (0)         | 0.736 | 0.161    |
| more than 3 weeks                                            | 0.5% (1)                   | 1.5% (1)                   |              | 6% (1)                  |              | 6% (1)         |       |          |
| <b>Skin infections 1 (SSTIs-1) - duration</b>                |                            |                            |              |                         |              |                |       |          |
| less than 1 week                                             | 56% (79/142)               | 50% (19/38)                |              | 38.5% (5/13)            |              | 9% (1/11)      |       |          |
| from 1 to 2 weeks                                            | 30% (42)                   | 32% (12)                   |              | 23% (3)                 |              | 36% (4)        |       |          |
| from 2 to 3 weeks                                            | 6% (9)                     | 5% (2)                     | 1.000        | 15% (2)                 | 0.469        | 36% (4)        | 0.141 | 0.098    |
| more than 3 weeks                                            | 8% (12)                    | 13% (5)                    |              | 23% (3)                 |              | 18% (0)        |       |          |
| <b>Skin infections 2 (SSTIs-2) - duration</b>                |                            |                            |              |                         |              |                |       |          |
| less than 1 week                                             | 56% (49/88)                | 67% (12/18)                |              | 100% (3/3)              |              | 56% (14/25)    |       |          |
| from 1 to 2 weeks                                            | 33% (29)                   | 28% (5)                    |              | 0% (0)                  |              | 36% (9)        |       |          |
| from 2 to 3 weeks                                            | 2% (2)                     | 5% (1)                     | 0.795        | 0% (0)                  | 0.844        | 0% (1)         | 0.879 | 0.407    |
| more than 3 weeks                                            | 9% (8)                     | 0% (0)                     |              | 0% (0)                  |              | 8% (2)         |       |          |
| <b>Mycosis (MYC) - duration</b>                              |                            |                            |              |                         |              |                |       |          |
| less than 1 week                                             | 33% (21/63)                | 33% (10/30)                |              | 43% (3/7)               |              | 30% (7/23)     |       |          |
| from 1 to 2 weeks                                            | 48% (30)                   | 10% (3)                    |              | 29% (2)                 |              | 4% (1)         |       |          |
| from 2 to 3 weeks                                            | 5% (3)                     | 40% (12)                   | 0.076        | 0% (0)                  | 0.893        | 52% (12)       | 0.228 | 0.052    |
| more than 3 weeks                                            | 14% (9)                    | 17% (5)                    |              | 29% (2)                 |              | 13% (3)        |       |          |
| <b>Sexually transmitted infections (STIs) - duration</b>     |                            |                            |              |                         |              |                |       |          |
| less than 1 week                                             | 22% (2/9)                  | 33% (1/3)                  |              | 0% (0/1)                |              | 50% (1/2)      |       |          |
| from 1 to 2 weeks                                            | 67% (6)                    | 33% (1)                    |              | 0% (0)                  |              | 50% (1)        |       |          |
| from 2 to 3 weeks                                            | 0% (0)                     | 33% (1)                    | 0.547        | 0% (0)                  | 0.347        | 0% (0)         | 0.897 | 0.223    |
| more than 3 weeks                                            | 11% (1)                    | 33% (1)                    |              | 100% (1)                |              | 0% (0)         |       |          |
| <b>Urinary tract infections (UTIs) duration</b>              |                            |                            |              |                         |              |                |       |          |
| less than 1 week                                             | 70% (59/86)                | 73% (30/41)                |              | 75% (9/12)              |              | 72% (21/29)    |       |          |
| from 1 to 2 weeks                                            | 24% (21)                   | 22% (9)                    |              | 25% (3)                 |              | 21% (6)        |       |          |
| from 2 to 3 weeks                                            | 2% (2)                     | 2.5% (1)                   | 1.000        | 20% (0)                 | 1.000        | 3% (1)         | 1.000 | 0.824    |
| more than 3 weeks                                            | 5% (4)                     | 2.5% (1)                   |              | 0% (0)                  |              | 3% (1)         |       |          |
